# Aerosolized $\alpha_1$ adrenoreceptor antagonism does not affect experimentally induced lung fibrosis in animal models

Short Title: Aerosolized  $\alpha_1$ -AR antagonism does not affect lung fibrosis

Alexander Ghincea<sup>1</sup>, Carrighan Perry<sup>1</sup>, Angela Liu<sup>1</sup>, John McGovern<sup>1</sup>, Sheeline Yu<sup>1</sup>, Xue-Yan Peng<sup>1</sup>, Genta Ishikawa<sup>1</sup>, Thomas Barnthaler<sup>1</sup>, Erica L. Herzog<sup>1,2</sup>, Huanxing Sun<sup>1\*</sup>

<sup>1</sup>Section of Pulmonary, Critical Care, and Sleep Medicine, Department of Internal Medicine, Yale University School of Medicine, New Haven, Connecticut, United States of America

<sup>2</sup>Department of Molecular Medicine and Experimental Pathology, Yale University School of Medicine, New Haven, Connecticut, United States of America

\*Corresponding author

Email: [huanxing.sun@yale.edu](mailto:huanxing.sun@yale.edu) (HXS)

## 50 **Abstract**

51 Pulmonary Fibrosis is a progressive and incurable condition that complicates many disease  
52 states. Adrenergic hyperinnervation and accumulation of fibroblasts expressing  $\alpha_1$ -  
53 adrenoceptors have been implicated in this process. Previous studies have demonstrated that  
54 systemic treatment with an  $\alpha_1$ -adrenoceptors antagonist attenuates fibrotic endpoints in lung  
55 fibrosis models. In an attempt to develop a lung targeted therapy, we determined whether  $\alpha_1$ -  
56 adrenoceptors antagonism delivered via inhaled administration of terazosin exerts antifibrotic  
57 benefits in experimentally induced lung fibrosis. C57/BL6 mice treated with bleomycin, or a  
58 doxycycline inducible line of transgenic mice with lung specific overexpression of the bioactive  
59 form of the human TGF $\beta$ 1 (*TGF $\beta$ 1-Tg<sup>+</sup>* model), received nebulized terazosin at varying doses on  
60 a therapeutic schedule following the induction of fibrosis and were sacrificed at 21 days. Airway  
61 inflammation, fibrotic endpoints, and lung function were evaluated.  $\alpha_1$ -adrenoceptors  
62 antagonism delivered via this method did not impact airway inflammation as indicated by  
63 bronchoalveolar lavage cell counts, and there was no significant difference observed in soluble  
64 collagen content. There was similarly no significant difference in respiratory mechanics with  
65 terazosin administration. These data show that inhaled delivery of the  $\alpha_1$ -adrenoceptors  
66 antagonist terazosin by this method is ineffective at treating fibrosis in these models and suggest  
67 that alternative dosing schedules or delivery methods may be more fruitful avenues of  
68 investigation. Further exploration of these findings may provide new therapeutic options and  
69 illuminate mechanisms through which adrenergic innervation and  $\alpha_1$ -adrenoceptors mediate  
70 fibrosis in the adult mammalian lung.

71 **Key words:** pulmonary fibrosis, adrenoceptor antagonism, terazosin, inhalation

72

73

## 74 Introduction

75 Pulmonary fibrosis (PF) is an incurable condition that complicates numerous interstitial  
76 lung diseases and is characterized by progressive pulmonary fibrosis and lung function decline  
77 [1, 2]. The incidence and demographic distribution of PF is heterogenous depending on underlying  
78 diagnosis but tends to occur in older adults and is often associated with a poor prognosis [3].  
79 Idiopathic pulmonary fibrosis (IPF), one of the better studied forms of PF, is defined by a pattern  
80 of usual interstitial pneumonia on imaging and histopathology in the absence of a known cause  
81 and has a median survival of 2-4 years [4, 5]. Though the underlying pathologic mechanisms vary,  
82 pulmonary fibrosis is thought to be the result of dysregulated lung healing that results in the  
83 accumulation of activated fibroblasts and excessive extracellular matrix [6-8]. Despite numerous  
84 recent advances, treatments remain limited and lung transplantation is the only cure [4, 9]. Thus,  
85 considering the significant morbidity and mortality caused by these diseases, there is an urgent  
86 need for new targeted interventions to reduce the burden of fibrosis.

87 Noradrenergic mechanisms are increasingly associated with numerous pathologic  
88 processes including acute inflammation [10, 11], innate immune activation [12, 13], cancer [14],  
89 obesity and metabolism [15], bone marrow aging [16], and pathologic lung remodeling [17-19].  
90 Adrenergic hyperinnervation and the accumulation of  $\alpha_1$ -adrenoreceptor ( $\alpha_1$ -AR) expressing cells  
91 are associated with fibrosis in animal models, where interruption of adrenergic signaling via  
92 chemical denervation and  $\alpha_1$ -AR antagonism mitigates fibrotic endpoints [17, 19]. It has further  
93 been shown that in some settings the blood [20] and lungs [19] of IPF patients are enriched for  
94 noradrenaline, and that IPF patients prescribed  $\alpha_1$ -AR antagonists for non-pulmonary indications  
95 experience improved survival [19]. However, despite the increasing association of noradrenaline  
96 and fibrotic lung remodeling, the mechanisms of this effect and its therapeutic potential remain  
97 unexplored [21, 22].

98 Pulmonary expression of  $\alpha_1$ -ARs is the best characterized in smooth muscle cells of the  
99 airways and vasculature, where they are reported to mediate noradrenaline-induced contractile  
100 responses [23, 24]. Interestingly, this receptor class is also expressed in parenchymal  
101 endothelium and fibroblasts [25], which may, in part, account for the capillary leak-associated  
102 fibroblast activation and extracellular matrix expansion caused by intravenous infusion of the  $\alpha_1$ -  
103 AR agonist phenylephrine [26, 27] and the therapeutic benefit of systemically administered  $\alpha_1$ -AR  
104 antagonism delivered via the oral or intraperitoneal routes [17-19]. However,  $\alpha_1$ -ARs are also  
105 expressed by populations of lung epithelia and airway inflammatory cells which may contribute to  
106 noradrenaline's well described role in remodeling responses of apoptosis [28], inflammatory cell  
107 trafficking [29], and cytokine production [30]. This expression pattern suggests that interventions  
108 leveraging inhaled administration might exert therapeutic benefit while minimizing off-target  
109 effects. Elucidation of this biology has the potential to provide insights into the cell(s) and  
110 mechanism(s) through which noradrenaline exerts its fibrogenic effects while exploring new  
111 treatment modalities [31-33] for parenchymal disease.

112 This study sought to address this knowledge gap by assessing whether inhaled  
113 administration of the non-selective  $\alpha_1$ -AR antagonist terazosin reduces lung inflammation,  
114 pulmonary function, biochemical collagen accumulation, and lung histology in two well accepted  
115 animal models of experimentally induced fibrosis.

116

## 117 **Materials and Methods**

### 118 **Study Design**

119 The objective of our study was to test the prespecified hypothesis that nebulized delivery  
120 of an  $\alpha_1$ -AR antagonist, specifically terazosin, would improve experimentally induced pulmonary  
121 fibrosis in two commonly used mouse models. Primary endpoints were prospectively determined.

## 122 **Animals**

123 All animal experiments were approved by the Yale School of Medicine IACUC in  
124 accordance with federal regulations (protocol #20292). Twenty-one days following the  
125 experimental induction of fibrosis, animals were anesthetized for pulmonary function testing, then  
126 humanely sacrificed to isolate bronchoalveolar lavage (BAL), and *en bloc* resection of lungs for  
127 soluble collagen quantification and histopathology scoring as we have previously described [34].  
128 C57 Black 6 (C57BL/6) wild-type mice were used for bleomycin experiments.  $TGF\beta 1$  lung specific  
129 over-expressing (*CC10-tTS-rtTA-TGF $\beta$ 1*, from here on called "*TGF $\beta$ 1-Tg<sup>+</sup>*") mice have been  
130 described previously [35] and develop fibrosis in response to doxycycline inducible expression of  
131 the bioactive form of the human *TGF $\beta$ 1* gene under the lung specific CC10 promoter. All  
132 experimental groups were matched for age and sex.

## 133 **Bleomycin model**

134 Sex-matched C57BL/6 aged 9 to 11 weeks mice were exposed to a single dose of 1.5  
135 U/kg pharmacologic grade bleomycin (Northstar Rx LLC, NDC 16714-886-0) or sterile saline by  
136 orotracheal aspiration [36]. Mice were anesthetized with isoflurane and suspended by their  
137 incisors on a standing rack. With the tongue held in gentle retraction, 50  $\mu$ L bleomycin or saline  
138 was pipetted into the oropharynx and aspirated. Animals were sacrificed after 21 days and  
139 evaluated for the endpoints described above.

## 140 ***TGF $\beta$ 1-Tg<sup>+</sup>* model**

141 Sex-matched 9 to 11-week-old wild-type *TGF $\beta$ 1-Tg<sup>+</sup>* mice received 0.5 mg/mL doxycycline  
142 hyclate (Thermo Scientific Cat No. J60579.22) in their drinking water for 21 days as previously  
143 described [35].

## 144 **Nebulization Experiments**

145 Starting at day 5 after bleomycin administration or doxycycline initiation, mice received  
146 daily administration of nebulized terazosin (Millipore Sigma, Product No. 1643452) dissolved in  
147 sterile water at concentrations of 0.001 mg/mL, 0.002 mg/mL, 0.01 mg/mL, 0.02 mg/mL, 0.1  
148 mg/mL, and 0.2 mg/mL which were derived to approximate a total inhaled dose of 0.001 mg/kg,  
149 0.002 mg/kg, 0.01 mg/kg, 0.02 mg/kg, 0.1 mg/kg, and 0.2 mg/kg per day (Fig S1) [37].  
150 Concentrations that showed potential benefit were selected for confirmatory studies. Groups of  
151 up to 5 mice from a single cage were placed in a clean plastic box with an attachment for nebulizer  
152 tubing in a manner similar to that used by Schroeder et al [38] for drug administration. Omron  
153 CompAir NE-C28 compressor nebulizers were used to aerosolize and deliver 7 mL of terazosin  
154 or sterile water control on a daily therapeutic schedule over 30 min after which mice were returned  
155 to their original cages. The same terazosin dose was repeated for every treatment within each  
156 group. A schematic of the nebulizer apparatus is shown in Fig 1A.

157

158 **Fig 1: Inhalational administration of the nonselective  $\alpha_1$ -AR antagonist terazosin does not**  
159 **impact lung inflammation. A:** Experimental design. Inhaled terazosin was started five days after  
160 bleomycin administration or doxycycline induced TGF $\beta$ 1 transgene activation. Up to 5 mice from  
161 a single cage were placed into a clean, lidded plastic box with an attachment for nebulizer tubing.  
162 7 mL of sterile water or terazosin was loaded into the nebulizer module for each treatment. Tubing  
163 connections were checked to be airtight prior to every treatment. Omron NE-C28 compressor  
164 nebulizers were used to aerosolize and deliver the treatment over 30 minutes. After treatment  
165 mice were returned to their original cages, and the plastic box and nebulizer equipment cleaned  
166 thoroughly. **B:** In the bleomycin model, relative to vehicle, inhaled terazosin had no significant  
167 impact on lung inflammation as measured by BAL cell counts. **C:** In the TGF $\beta$ 1-Tg<sup>+</sup> model, relative  
168 to vehicle, inhaled terazosin had no significant impact on lung inflammation as measured by BAL  
169 cell counts. Schematic diagrams created using BioRender.com

170

## 171 **BAL cell count**

172 At the time of sacrifice, two aliquots of 0.8 mL of PBS were slowly instilled into lung and  
173 the lavage fluid gently aspirated. The combined BAL sample was assessed for white blood cell  
174 counts using a Beckman Coulter Ac.T Diff instrument.

## 175 **Pulmonary function testing**

176 Pulmonary mechanics and airway hyperresponsiveness were assessed in a subset of  
177 terazosin-exposed and control mice from both bleomycin and *TGF $\beta$ -Tg<sup>+</sup>* arms of our study using  
178 the Sireq FlexiVent Fx computer-controlled piston ventilator running Flexiware version 7.6 [39].  
179 Animals were anesthetized with an intraperitoneally administered mixture of xylazine and  
180 ketamine, xylazine (Akorn, NDC 59399-110-20) at a dose of 10 mg/kg and ketamine (Covetrus,  
181 NDC 11695-0703-1) at a dose of 100 mg/kg, followed by urethane at a dose between 0.009 to  
182 0.03 g per mouse, administered intraperitoneally. Once an appropriate level of sedation was  
183 established, a midline neck incision was made, and the soft tissue dissected to expose the  
184 trachea. A rigid 20-gauge blunt tipped catheter for female mice or 18-gauge blunt tipped catheter  
185 for male mice was used to cannulate the trachea. Mice were then paralyzed with pancuronium  
186 bromide (Sigma, Cat# P1918-10mg) at a dose of 10  $\mu$ g per mouse and attached to the FlexiVent  
187 for pulmonary function measurements. Methacholine (SigmaAldrich A2251-25G) was used for  
188 airway hyperresponsiveness measurements. After completion of lung function testing, mice were  
189 humanely euthanized and harvested for tissue as described above.

## 190 **Collagen quantification**

191 Right lung soluble collagen content was assessed using the Sircol Soluble Collagen Assay  
192 (Biocolor Ltd., CLS 1111) according to the manufacturer's instructions.

## 193 **Histologic analysis**

194 Formalin fixed and paraffin embedded (FFPE) tissue sections obtained from whole left  
195 lungs harvested from experimental animals were stained with Masson's trichrome stain to  
196 visualize collagen deposition. Modified Ashcroft Scores, a semiquantitative scoring system  
197 validated for experimentally induced fibrosis in rodents, were also determined [40].

## 198 **Statistics**

199 GraphPad Prism version 9.4.1 was used for statistical analysis and data graphing.  
200 Unpaired 2-tailed Mann-Whitney and Kruskal-Wallis tests were used for nonparametric  
201 comparisons, and 2-tailed Students T-test and Analysis of Variance used for parametric  
202 comparisons. The slopes of expiratory flow-volume loops and airway resistance curves were  
203 compared using simple linear regression.

204

## 205 **Results**

### 206 **Inhalational administration of an $\alpha_1$ -AR antagonist does not** 207 **impact lung inflammation**

208  $\alpha_1$ -AR antagonists administered via oral or intraperitoneal routes demonstrate antifibrotic  
209 benefit in models of cross organ fibrosis including the lung, liver, heart, and kidney [41-44]. To  
210 determine whether similar benefit is achieved by local delivery to the lung, the following  
211 experiments were performed. Because the benefits of  $\alpha_1$ -AR antagonism include attenuation of  
212 inflammation [45, 46] and TGF $\beta$ 1-dependent tissue responses [47], two experimental models  
213 were used: single dose inhaled bleomycin, and lung specific, doxycycline inducible  
214 overexpression of the bioactive form of the human *TGF $\beta$ 1* gene. In both models, mice received  
215 nebulized terazosin according to a therapeutic schedule (Fig 1A). Doses were determined based  
216 on previous literature indicating a 1:1 conversion between systemic and inhaled delivery of the  
217 related  $\alpha_1$ -AR antagonist, Prazosin [48]. Because  $\alpha_1$ -AR antagonism mitigates lung inflammation



218 in a number of contexts, we began by determining whether this treatment might reduce the airway  
219 inflammation associated with pulmonary fibrosis in the hyperinflammatory bleomycin model. The  
220 assessment of BAL cell counts in the bleomycin model revealed no significant change following  
221 administration of nebulized terazosin at any dose (Fig 1B). Similar findings were seen in the  
222 *TGF $\beta$ 1-Tg<sup>+</sup>* model, where BAL cell counts remained essentially unaltered by terazosin (Fig 1C).  
223 These data indicate that at the range of doses tested, aerosolized delivery of an  $\alpha_1$ -AR antagonist  
224 does not impact the magnitude of lung inflammation.

225

## 226 **Inhalational administration of an $\alpha_1$ -AR antagonist does not** 227 **impact lung compliance or airway resistance**

228 Physiologic changes caused by pulmonary fibrosis include the development of restrictive  
229 lung physiology and our previous work has shown that patients prescribed  $\alpha_1$ -AR antagonists for  
230 prostate-related indications exhibited preserved lung compliance as reflected by the forced vital  
231 capacity (FVC) [19] and could improve lung compliance without a concomitant increase in airway  
232 resistance that could be theoretically induced by  $\alpha_1$ -AR signaling [48]. To test this hypothesis,  
233 bleomycin-challenged mice that had or had not received inhaled terazosin underwent pulmonary  
234 function testing using the FlexiVent system. In the bleomycin model, mean baseline static lung  
235 compliance of 0.046 mL/cmH<sub>2</sub>O (Fig 2A), pressure-volume loops (Fig 2B), and mean baseline  
236 maximal airway resistance of 2.96 cmH<sub>2</sub>O.s/mL assessed following methacholine challenge (Fig  
237 2C) were not significantly changed by terazosin administration. Similar findings were observed in  
238 the *TGF $\beta$ 1-Tg<sup>+</sup>* mice, where baseline static compliance of 0.044 mL/cmH<sub>2</sub>O and airway  
239 resistance of 5.66 cmH<sub>2</sub>O.s/mL did not display changes in response to nebulized terazosin (Fig  
240 2D-F). These data show that aerosolized delivery of the  $\alpha_1$ -AR antagonist terazosin is ineffective  
241 in altering lung physiology in two models of fibrotic ILD.

242

243 **Fig 2: Inhalational administration of an  $\alpha_1$ -AR antagonist does not impact lung compliance**  
244 **or airway resistance. A:** Bleomycin-challenged mice that had or had not received inhaled  
245 terazosin underwent pulmonary function testing using the FlexiVent system. Here, a mean  
246 baseline static lung compliance of 0.046 mL/cmH<sub>2</sub>O was observed in untreated mice and was  
247 not significantly altered by terazosin administration. **B:** Terazosin did not significantly change the  
248 pressure-volume relationship for lungs tested. **C:** Maximal airway resistance assessed following  
249 methacholine challenge did not significantly change following terazosin administration from a  
250 mean baseline of 2.96 cmH<sub>2</sub>O.s/mL in untreated mice. **D-F:** Similar findings were observed in the  
251 TGF $\beta$ 1-Tg<sup>+</sup> mice, where baseline static compliance of 0.044 mL/cmH<sub>2</sub>O and airway resistance of  
252 5.66 cmH<sub>2</sub>O.s/mL did not display changes in response to nebulized terazosin. These data show  
253 that aerosolized delivery of the  $\alpha_1$ -AR antagonist terazosin is ineffective in altering lung physiology  
254 in two models of fibrotic ILD.

255

256 **Inhalational administration of an  $\alpha_1$ -AR antagonist does not**  
257 **impact lung collagen accumulation**

258 Systemic administration of  $\alpha_1$ -AR antagonists has been shown to suppress fibroblast  
259 activation and its associated accumulation of collagen in numerous models of organ fibrosis. Our  
260 own work and that of others shows that this effect extends to the lungs [17, 19]. Reasoning that  
261 local delivery of the  $\alpha_1$ -AR antagonist terazosin might show similar efficacy, the lungs of  
262 bleomycin-challenged mice that did and did not receive terazosin underwent biochemical  
263 quantification of collagen using the well described Sircol assay. Using this approach, fold change  
264 from a baseline collagen content per whole right lung was essentially unchanged across all  
265 terazosin doses tested (Fig 3A). In the TGF $\beta$ 1-Tg<sup>+</sup> model, promising reductions in the fold change  
266 from baseline collagen content per whole right lung were observed at several tested terazosin  
267 doses (Fig 3B). Based on these results we selected the terazosin doses of 0.002 and 0.02 mg/mL

268 for confirmatory studies but were unable to replicate our initial results (Fig 3C-D). Given these  
269 conflicting findings, we sought to confirm our results using histological measures such as  
270 trichrome staining and semi-quantitative modified Ashcroft scores, which complement  
271 biochemical measures by assessing collagen accumulation in parenchymal regions. The results  
272 of these studies were consistent with our confirmatory biochemical measurements, as in the  
273 *TGFβ1-Tg<sup>+</sup>* model trichrome staining and baseline modified Ashcroft scores was similar at the  
274 doses of terazosin assessed (Fig 3E-F). When viewed in combination, our data show that  
275 localized delivery of aerosolized terazosin exerts no observable benefit in these models and is  
276 insufficient to mitigate lung fibrosis.

277

278 **Fig 3: Inhalational administration of an  $\alpha_1$ -AR antagonist does not impact lung collagen**  
279 **accumulation. A:** Fold change from baseline collagen content per whole right lung was  
280 essentially unchanged across all doses tested in bleomycin challenged mice. **B:** In the *TGFβ1-*  
281 *Tg<sup>+</sup>* model, initial studies revealed a significant difference in fold change from baseline right lung  
282 collagen content at 0.002 mg/mL, 0.01 mg/mL, 0.02 mg/mL, and 0.1 mg/mL Terazosin. **C-D:** Due  
283 to these initially promising results confirmatory studies were performed for 0.002 mg/mL and 0.02  
284 mg/mL. We were unable to replicate the initially promising differences seen in *TGFβ-Tg<sup>+</sup>* animals  
285 at Terazosin doses of 0.002 mg/mL and 0.02 mg/mL. **E-F:** Trichrome staining and semi-  
286 quantitative Modified Ashcroft Scores done in our confirmatory studies did not significantly change  
287 after administration of terazosin. These data show that in contrast to the previously reported  
288 antifibrotic benefit of systemic  $\alpha_1$ -AR, nebulized delivery of this agent is insufficient to mitigate  
289 collagen deposition in lung tissues.

290

291

292

## 293 Discussion

294 This study aimed to determine whether local delivery of the  $\alpha_1$ -AR antagonist terazosin  
295 improves markers of pulmonary fibrosis in two different animal models. Our data indicate that the  
296 administration of terazosin in nebulized form did not impact lung inflammation, airway compliance  
297 or resistance, collagen accumulation, or histologic measures of lung remodeling in the bleomycin  
298 and *TGF $\beta$ 1-Tg<sup>+</sup>* models of murine pulmonary fibrosis. These results are in contrast to prior work  
299 in which intraperitoneal administration of terazosin modulates fibrotic changes in bleomycin  
300 challenged mice [17] and numerous studies demonstrating that  $\alpha_1$ -AR blockade improves fibrotic  
301 endpoints in cross-organ models of tissue fibrosis including the lung, liver, heart, and kidney [41-  
302 44]. Notably, because the present study assessed localized tissue delivery as opposed to  
303 systemic  $\alpha_1$ -AR antagonism, our data indicate that alternate approaches will be required to  
304 support the repositioning of this drug for the treatment of lung fibrosis.

305 The  $\alpha_1$ -ARs are a conserved family of G-protein coupled receptors found in numerous  
306 tissues including the lung and have been identified both intracellularly and on the extracellular  
307 membrane of smooth muscle cells in the airway and pulmonary vasculature, immune cells, and  
308 fibroblasts [23, 24, 49]. Additionally  $\alpha_1$ -AR agonism has been linked to increased expression of  
309 inflammatory markers such as IL-1 $\alpha$ , IL-1 $\beta$ , IL-6, and TNF- $\alpha$  both systemically and in the lungs,  
310 and prior work has associated this to increased levels of TGF $\beta$  [27]. In contrast, systemically  
311 delivered  $\alpha_1$ -AR antagonism has been shown to attenuate lung inflammation [45, 46] and TGF $\beta$ 1-  
312 dependent tissue responses [47], is associated with improved fibrotic endpoints [41-44] and  
313 survival in IPF patients [19]. One interpretation of our conflicting results is that administration of  
314  $\alpha_1$ -AR antagonist by nebulized aerosol might only interact with cells locally in the airway and  
315 alveolus and may not achieve sufficient uptake to the fibrotic interstitium to exert its effects on the  
316 fibroblasts, myofibroblasts, and pericytes that are the primary effectors of fibrosis (Fig 4).

317

318 **Fig 4: Proposed schematics. A.** Schematic of the proposed basic mechanism of terazosin. By  
319 non-selectively antagonizing  $\alpha_1$ -ARs, Terazosin is proposed to block the pro-fibrotic effects of  
320 noradrenaline in the lung. **B.** Adrenergic nerve density is increased in the fibrotic lung and  
321 increased noradrenaline is believed to promote a fibrotic phenotype. Numerous cell types  
322 including fibroblasts, myofibroblasts, macrophages, airway epithelial cells, and sympathetic  
323 neurons express  $\alpha_1$ -ARs, and these are up-regulated in fibrosis. There are several mechanisms  
324 which may explain the lack of anti-fibrotic effect observed in our study. When terazosin is  
325 nebulized and inhaled, particulate size, dosage, and the heterogeneous nature of fibrotic lung  
326 may limit the amount of drug that reaches the terminal airways and alveoli (indicated by more  
327 lightly shaded particulates in the schematic). Additionally, though remodeling responses  
328 secondary to noradrenaline have been described in the epithelium, the terazosin dose when  
329 administered in nebulized form may be insufficient to alter pro-fibrotic signaling. Alveolar  
330 macrophages, which are more likely to be exposed to terazosin, may not play as large a role in  
331 the development of fibrosis in our model. Finally, transport of terazosin across the basement  
332 membrane may also be limited so that insufficient quantities of the drug reach interstitial  
333 fibroblasts, myofibroblasts, and pericytes. In contrast, systemic administration of terazosin is more  
334 likely to achieve therapeutic levels for  $\alpha_1$ -AR antagonism in fibrotic foci. Created with  
335 BioRender.com

336  
337 Terazosin is a specific  $\alpha_1$ -AR antagonist [50] that has been approved for use for decades  
338 in the treatment of benign prostatic hyperplasia and hypertension, and has a well-established  
339 safety profile [51, 52]. Its long half-life makes it well suited for once daily administration [53].  
340 Though there are no prior studies assessing inhalational forms of terazosin, other  $\alpha_1$ -AR  
341 antagonists have been studied in the context of asthma [54] including a nebulized form of another  
342 long acting  $\alpha_1$ -AR antagonist Prazosin [48, 55, 56]. While these early studies had limited efficacy

343 in the overall management of asthma, they did indicate that nebulized delivery of  $\alpha_1$ -AR  
344 antagonists is a viable modality. However, the fibrotic lung is spatially heterogenous with areas of  
345 normal tissue interspersed with diseased lung that has mismatched ventilation and perfusion [57].  
346 Numerous agents are in development or have been investigated for topical delivery in IPF and  
347 recent work has demonstrated that particulate dimension is critically important for adequate drug  
348 delivery to fibrotic sites [58]. Specifically, Usmani and colleagues demonstrated that a particulate  
349 size of 1.5  $\mu\text{m}$  compared to 6  $\mu\text{m}$  was best for uptake in the fibrotic lung [58]. The Omron CompAir  
350 NE-C28 compressor nebulizers used in the present study produce an aerosol particle size of 3  
351  $\mu\text{m}$  median mass aerodynamic diameter. While suboptimal based upon the aforementioned  
352 study, we believe that this particle size should reach the terminal airways. However, particulate  
353 size may yet represent a potential source for the negative results observed in our study. If too  
354 large, the particulates may become trapped in the oropharynx, trachea, or larger airways and fail  
355 to reach fibrotic regions.

356 Our study is limited in not having assessed the spatial delivery of drug within the mouse  
357 lung nor systemic uptake of terazosin into the bloodstream. Target engagement was also not  
358 evaluated. Furthermore, our apparatus delivered the aerosolized terazosin into a box containing  
359 several mice such that at least some amount of the aerosol was deposited onto the fur of treated  
360 animals as well as the interior surface of the container, limiting the quantity of terazosin inhaled  
361 into the lungs. Oral ingestion of drug accumulated on the fur or interior surface may further  
362 confound our results. Finally, the dose of terazosin administered, or dosing schedule utilized may  
363 have been insufficient to achieve adequate penetration or  $\alpha_1$ -AR blockade. Recent work by Bai et  
364 al using a nanoparticle delivery system presents an alternative method for blocking  $\alpha_1$ -ARs that  
365 can be investigated in future studies [59].

366

367

## 368 **Conclusion**

369           Aerosolized delivery of the  $\alpha_1$ -AR antagonist terazosin is ineffective at treating fibrosis in  
370 the bleomycin and *TGF $\beta$ 1-Tg<sup>t</sup>* models of murine pulmonary fibrosis. Given existing data showing  
371 benefit from systemic  $\alpha_1$ -AR antagonism in fibrotic models, alternative dosing schedules or modes  
372 of delivery may be more fruitful avenues of research. Further exploration of these findings may  
373 provide new therapeutic options and illuminate the mechanisms through which adrenergic  
374 innervation and  $\alpha_1$ -ARs mediate fibrosis in the adult mammalian lung.

375

## 376 **Acknowledgements**

377           This work was supported by The Assistant Secretary of Defense for Health Affairs  
378 endorsed by the Department of Defense, in the amount of (\$334,999.00), through the Peer  
379 Reviewed Medical Research Program under Award Number W81XWH-20-1-0157. Opinions,  
380 interpretations, conclusions, and recommendations contained herein are those of the author(s)  
381 and are not necessarily endorsed by the Department of Defense. The U.S. Army Medical  
382 Research Acquisition Activity, 820 Chandler Street, Fort Detrick MD 21702-5014 is the awarding  
383 and administering acquisition office. In conducting research using animals, the investigator(s)  
384 adhere(s) to the laws of the United States and regulations of the Department of Agriculture. In the  
385 conduct of research utilizing recombinant DNA, the investigator(s) adhered to NIH Guidelines for  
386 research involving recombinant DNA molecules. In the conduct of research involving hazardous  
387 organisms or toxins, the investigator(s) adhered to the CDC-NIH Guide for Biosafety in  
388 Microbiological and Biomedical Laboratories.

389           We are grateful for Dr. Qing Liu's instruction of the operation of the FlexiVent System and  
390 the Omron CompAir NE-C28 compressor nebulizer.

391

## 392 Supporting information

393 **Fig S1: Method used to derive Terazosin doses administered.** **A:** The time ( $T_f$ ) to fill the box  
394 in which mice were placed for nebulization experiments with nebulized drug is represented by the  
395 quotient of Box Volume divided by the Nebulizer Flow Rate. Our enclosures have a volume of  
396 6682 mL, and the Omron CompAir NE-C28 nebulizer has a flow rate of 4000 mL/min. **B:** The  
397 aggregate rate ( $R$ ) at which nebulized drug enters the box is equal to the total Volume of Drug  
398 used divided by the Nebulization Time multiplied by the Drug Concentration loaded into the  
399 nebulizer. 7 mL of drug was used in our experiments, and based on our observations, the Omron  
400 CompAir NE-C28 nebulizer requires approximately 30 minutes to nebulize all 7 mL. **C:** The drug  
401 weight ( $D_w$ ) of nebulized terazosin within our enclosure is equal to the product of  $T_f$  and  $R$ . **D:**  
402 When divided by the box volume, this results in the nebulized drug's concentration ( $D_c$ ) within the  
403 box. Minute Ventilation ( $\dot{V}_E$ ) is equal to the product of Respiratory Rate and Tidal Volume. The  
404 respiratory rate for adult mice is 187 breaths per minute, and the tidal volume 0.061 mL and 0.094  
405 mL for 20g and 25g mice respectively (38). **E:** Thus, we derive the total dose of drug in milligrams  
406 inhaled ( $D_i$ ) by a single mouse during each 30-minute nebulization treatment to be equal to the  
407 product of  $D_c$ ,  $\dot{V}_E$ , and nebulization time.

408

409

410

411

412

413

414

415

416



## 417 **References**

- 418 1. Wells AU, Brown KK, Flaherty KR, Kolb M, Thannickal VJ, Group IPFCW. What's in a name?  
419 That which we call IPF, by any other name would act the same. *Eur Respir J.* 2018;51(5). Epub  
420 20180517. doi: 10.1183/13993003.00692-2018. PubMed PMID: 29773608.
- 421 2. Cottin V, Hirani NA, Hotchkin DL, Nambiar AM, Ogura T, Otaola M, et al. Presentation,  
422 diagnosis and clinical course of the spectrum of progressive-fibrosing interstitial lung diseases.  
423 *Eur Respir Rev.* 2018;27(150). Epub 20181221. doi: 10.1183/16000617.0076-2018. PubMed  
424 PMID: 30578335; PubMed Central PMCID: PMCPCMC9489068.
- 425 3. Olson AL, Gifford AH, Inase N, Fernandez Perez ER, Suda T. The epidemiology of idiopathic  
426 pulmonary fibrosis and interstitial lung diseases at risk of a progressive-fibrosing phenotype. *Eur*  
427 *Respir Rev.* 2018;27(150). Epub 20181221. doi: 10.1183/16000617.0077-2018. PubMed PMID:  
428 30578336.
- 429 4. Raghu G, Remy-Jardin M, Richeldi L, Thomson CC, Inoue Y, Johkoh T, et al. Idiopathic  
430 Pulmonary Fibrosis (an Update) and Progressive Pulmonary Fibrosis in Adults: An Official  
431 ATS/ERS/JRS/ALAT Clinical Practice Guideline. *Am J Respir Crit Care Med.* 2022;205(9):e18-e47.  
432 doi: 10.1164/rccm.202202-0399ST. PubMed PMID: 35486072.
- 433 5. Raghu G, Chen SY, Yeh WS, Maroni B, Li Q, Lee YC, et al. Idiopathic pulmonary fibrosis in  
434 US Medicare beneficiaries aged 65 years and older: incidence, prevalence, and survival, 2001-11.  
435 *Lancet Respir Med.* 2014;2(7):566-72. Epub 20140527. doi: 10.1016/S2213-2600(14)70101-8.  
436 PubMed PMID: 24875841.
- 437 6. Mei Q, Liu Z, Zuo H, Yang Z, Qu J. Idiopathic Pulmonary Fibrosis: An Update on  
438 Pathogenesis. *Front Pharmacol.* 2021;12:797292. Epub 20220119. doi:  
439 10.3389/fphar.2021.797292. PubMed PMID: 35126134; PubMed Central PMCID:  
440 PMCPCMC8807692.
- 441 7. Ishikawa G, Liu A, Herzog EL. Evolving Perspectives on Innate Immune Mechanisms of IPF.  
442 *Front Mol Biosci.* 2021;8:676569. Epub 20210809. doi: 10.3389/fmolb.2021.676569. PubMed  
443 PMID: 34434962; PubMed Central PMCID: PMCPCMC8381017.
- 444 8. Wijsenbeek M, Cottin V. Spectrum of Fibrotic Lung Diseases. *N Engl J Med.*  
445 2020;383(10):958-68. doi: 10.1056/NEJMra2005230. PubMed PMID: 32877584.
- 446 9. Flaherty KR, Wells AU, Cottin V, Devaraj A, Walsh SLF, Inoue Y, et al. Nintedanib in  
447 Progressive Fibrosing Interstitial Lung Diseases. *N Engl J Med.* 2019;381(18):1718-27. Epub  
448 20190929. doi: 10.1056/NEJMoa1908681. PubMed PMID: 31566307.
- 449 10. Mirakaj V, Dalli J, Granja T, Rosenberger P, Serhan CN. Vagus nerve controls resolution  
450 and pro-resolving mediators of inflammation. *J Exp Med.* 2014;211(6):1037-48. Epub 20140526.  
451 doi: 10.1084/jem.20132103. PubMed PMID: 24863066; PubMed Central PMCID:  
452 PMCPCMC4042652.
- 453 11. Borovikova LV, Ivanova S, Zhang M, Yang H, Botchkina GI, Watkins LR, et al. Vagus nerve  
454 stimulation attenuates the systemic inflammatory response to endotoxin. *Nature.*  
455 2000;405(6785):458-62. doi: 10.1038/35013070. PubMed PMID: 10839541.
- 456 12. Willemze RA, Welting O, van Hamersveld P, Verseijden C, Nijhuis LE, Hilbers FW, et al.  
457 Loss of intestinal sympathetic innervation elicits an innate immune driven colitis. *Mol Med.*

- 458 2019;25(1):1. Epub 20190107. doi: 10.1186/s10020-018-0068-8. PubMed PMID: 30616543;  
459 PubMed Central PMCID: PMCPMC6322236.
- 460 13. Grebe KM, Takeda K, Hickman HD, Bailey AL, Embry AC, Bennink JR, et al. Cutting edge:  
461 Sympathetic nervous system increases proinflammatory cytokines and exacerbates influenza A  
462 virus pathogenesis. *J Immunol.* 2010;184(2):540-4. Epub 20091216. doi:  
463 10.4049/jimmunol.0903395. PubMed PMID: 20018617; PubMed Central PMCID:  
464 PMCPMC2941093.
- 465 14. Zahalka AH, Arnal-Estape A, Maryanovich M, Nakahara F, Cruz CD, Finley LWS, et al.  
466 Adrenergic nerves activate an angio-metabolic switch in prostate cancer. *Science.*  
467 2017;358(6361):321-6. doi: 10.1126/science.aah5072. PubMed PMID: 29051371; PubMed  
468 Central PMCID: PMCPMC5783182.
- 469 15. Pirzgalska RM, Seixas E, Seidman JS, Link VM, Sanchez NM, Mahu I, et al. Sympathetic  
470 neuron-associated macrophages contribute to obesity by importing and metabolizing  
471 norepinephrine. *Nat Med.* 2017;23(11):1309-18. Epub 20171009. doi: 10.1038/nm.4422.  
472 PubMed PMID: 29035364; PubMed Central PMCID: PMCPMC7104364.
- 473 16. Maryanovich M, Zahalka AH, Pierce H, Pinho S, Nakahara F, Asada N, et al. Adrenergic  
474 nerve degeneration in bone marrow drives aging of the hematopoietic stem cell niche. *Nat Med.*  
475 2018;24(6):782-91. Epub 20180507. doi: 10.1038/s41591-018-0030-x. PubMed PMID: 29736022;  
476 PubMed Central PMCID: PMCPMC6095812.
- 477 17. Ishikawa G, Peng X, McGovern J, Woo S, Perry C, Liu A, et al. alpha1 Adrenoreceptor  
478 antagonism mitigates extracellular mitochondrial DNA accumulation in lung fibrosis models and  
479 in patients with idiopathic pulmonary fibrosis. *Am J Physiol Lung Cell Mol Physiol.*  
480 2023;324(5):L639-L51. Epub 20230117. doi: 10.1152/ajplung.00119.2022. PubMed PMID:  
481 36648147; PubMed Central PMCID: PMCPMC10110730.
- 482 18. Briest W, Homagk L, Rassler B, Ziegelhoffer-Mihalovicova B, Meier H, Tannapfel A, et al.  
483 Norepinephrine-induced changes in cardiac transforming growth factor-beta isoform expression  
484 pattern of female and male rats. *Hypertension.* 2004;44(4):410-8. Epub 20040823. doi:  
485 10.1161/01.HYP.0000141414.87026.4d. PubMed PMID: 15326086.
- 486 19. Gao R, Peng X, Perry C, Sun H, Ntokou A, Ryu C, et al. Macrophage-derived netrin-1 drives  
487 adrenergic nerve-associated lung fibrosis. *J Clin Invest.* 2021;131(1). doi: 10.1172/JCI136542.  
488 PubMed PMID: 33393489; PubMed Central PMCID: PMCPMC7773383.
- 489 20. Miki K, Maekura R, Hiraga T, Hashimoto H, Kitada S, Miki M, et al. Acidosis and raised  
490 norepinephrine levels are associated with exercise dyspnoea in idiopathic pulmonary fibrosis.  
491 *Respirology.* 2009;14(7):1020-6. doi: 10.1111/j.1440-1843.2009.01607.x. PubMed PMID:  
492 19740262.
- 493 21. Gillis CN, Huxtable RJ, Roth RA. Effects of monocrotaline pretreatment of rats on removal  
494 of 5-hydroxytryptamine and noradrenaline by perfused lung. *Br J Pharmacol.* 1978;63(3):435-43.  
495 doi: 10.1111/j.1476-5381.1978.tb07795.x. PubMed PMID: 667487; PubMed Central PMCID:  
496 PMCPMC1668101.
- 497 22. Oriowo MA, Chandrasekhar B, Kadavil EA. Alpha 1-adrenoceptor subtypes mediating  
498 noradrenaline-induced contraction of pulmonary artery from pulmonary hypertensive rats. *Eur J*  
499 *Pharmacol.* 2003;482(1-3):255-63. doi: 10.1016/j.ejphar.2003.10.001. PubMed PMID: 14660030.
- 500 23. Reinhardt D. Adrenoceptors and the lung: their role in health and disease. *Eur J Pediatr.*  
501 1989;148(4):286-93. doi: 10.1007/BF00444116. PubMed PMID: 2651128.

- 502 24. Salvi SS. Alpha1-adrenergic hypothesis for pulmonary hypertension. *Chest*.  
503 1999;115(6):1708-19. doi: 10.1378/chest.115.6.1708. PubMed PMID: 10378571.
- 504 25. Neumark N, Cosme C, Jr., Rose KA, Kaminski N. The Idiopathic Pulmonary Fibrosis Cell  
505 Atlas. *Am J Physiol Lung Cell Mol Physiol*. 2020;319(6):L887-L93. Epub 20200930. doi:  
506 10.1152/ajplung.00451.2020. PubMed PMID: 32996785; PubMed Central PMCID:  
507 PMCPMC7792683.
- 508 26. Rassler B, Marx G, Schierle K, Zimmer HG. Catecholamines can induce pulmonary  
509 remodeling in rats. *Cell Physiol Biochem*. 2012;30(5):1134-47. Epub 20121005. doi:  
510 10.1159/000343304. PubMed PMID: 23171784.
- 511 27. Rassler B. Role of alpha- and beta-adrenergic mechanisms in the pathogenesis of  
512 pulmonary injuries characterized by edema, inflammation and fibrosis. *Cardiovasc Hematol*  
513 *Disord Drug Targets*. 2013;13(3):197-207. doi: 10.2174/1871529x1303140129154602. PubMed  
514 PMID: 24479719.
- 515 28. Dincer HE, Gangopadhyay N, Wang R, Uhal BD. Norepinephrine induces alveolar epithelial  
516 apoptosis mediated by alpha-, beta-, and angiotensin receptor activation. *Am J Physiol Lung Cell*  
517 *Mol Physiol*. 2001;281(3):L624-30. doi: 10.1152/ajplung.2001.281.3.L624. PubMed PMID:  
518 11504689.
- 519 29. Abraham E, Kaneko DJ, Shenkar R. Effects of endogenous and exogenous catecholamines  
520 on LPS-induced neutrophil trafficking and activation. *Am J Physiol*. 1999;276(1):L1-8. doi:  
521 10.1152/ajplung.1999.276.1.L1. PubMed PMID: 9887049.
- 522 30. Staedtke V, Bai RY, Kim K, Darvas M, Davila ML, Riggins GJ, et al. Disruption of a self-  
523 amplifying catecholamine loop reduces cytokine release syndrome. *Nature*. 2018;564(7735):273-  
524 7. Epub 20181212. doi: 10.1038/s41586-018-0774-y. PubMed PMID: 30542164; PubMed Central  
525 PMCID: PMC6512810.
- 526 31. Lu M, Fan X, Liao W, Li Y, Ma L, Yuan M, et al. Identification of significant genes as  
527 prognostic markers and potential tumor suppressors in lung adenocarcinoma via bioinformatical  
528 analysis. *BMC Cancer*. 2021;21(1):616. Epub 20210526. doi: 10.1186/s12885-021-08308-3.  
529 PubMed PMID: 34039311; PubMed Central PMCID: PMC68157630.
- 530 32. Muhl L, Mocci G, Pietila R, Liu J, He L, Genove G, et al. A single-cell transcriptomic  
531 inventory of murine smooth muscle cells. *Dev Cell*. 2022;57(20):2426-43 e6. doi:  
532 10.1016/j.devcel.2022.09.015. PubMed PMID: 36283392.
- 533 33. Kircali MF, Turanli B. Idiopathic Pulmonary Fibrosis Molecular Substrates Revealed by  
534 Competing Endogenous RNA Regulatory Networks. *OMICS*. 2023;27(8):381-92. Epub 20230804.  
535 doi: 10.1089/omi.2023.0072. PubMed PMID: 37540140.
- 536 34. Zhou Y, Peng H, Sun H, Peng X, Tang C, Gan Y, et al. Chitinase 3-like 1 suppresses injury  
537 and promotes fibroproliferative responses in Mammalian lung fibrosis. *Sci Transl Med*.  
538 2014;6(240):240ra76. doi: 10.1126/scitranslmed.3007096. PubMed PMID: 24920662; PubMed  
539 Central PMCID: PMC4340473.
- 540 35. Lee CG, Cho SJ, Kang MJ, Chapoval SP, Lee PJ, Noble PW, et al. Early growth response gene  
541 1-mediated apoptosis is essential for transforming growth factor beta1-induced pulmonary  
542 fibrosis. *J Exp Med*. 2004;200(3):377-89. doi: 10.1084/jem.20040104. PubMed PMID: 15289506;  
543 PubMed Central PMCID: PMC12211975.
- 544 36. Mehdizadeh S, Taherian M, Bayati P, Mousavizadeh K, Pashangzadeh S, Anisian A, et al.  
545 Plumbagin attenuates Bleomycin-induced lung fibrosis in mice. *Allergy Asthma Clin Immunol*.

- 546 2022;18(1):93. Epub 20221021. doi: 10.1186/s13223-022-00734-7. PubMed PMID: 36271442;  
547 PubMed Central PMCID: PMCPMC9585773.
- 548 37. Depledge MH. Respiration and lung function in the mouse, *Mus musculus* (with a note on  
549 mass exponents and respiratory variables). *Respir Physiol*. 1985;60(1):83-94. doi: 10.1016/0034-  
550 5687(85)90041-6. PubMed PMID: 4001609.
- 551 38. Schroeder WG, Mitrescu LM, Hart ML, Unnithan R, Gilchrist JM, Smith EE, et al. Flexible  
552 low-cost system for small animal aerosol inhalation exposure to drugs, proteins, inflammatory  
553 agents, and infectious agents. *Biotechniques*. 2009;46(3 Suppl):Piii-Pviii. doi:  
554 10.2144/000112895. PubMed PMID: 19317668.
- 555 39. McGovern TK, Robichaud A, Fereydoonzad L, Schuessler TF, Martin JG. Evaluation of  
556 respiratory system mechanics in mice using the forced oscillation technique. *J Vis Exp*.  
557 2013;(75):e50172. Epub 20130515. doi: 10.3791/50172. PubMed PMID: 23711876; PubMed  
558 Central PMCID: PMCPMC3684007.
- 559 40. Hubner RH, Gitter W, El Mokhtari NE, Mathiak M, Both M, Bolte H, et al. Standardized  
560 quantification of pulmonary fibrosis in histological samples. *Biotechniques*. 2008;44(4):507-11,  
561 14-7. doi: 10.2144/000112729. PubMed PMID: 18476815.
- 562 41. Urushiyama H, Terasaki Y, Nagasaka S, Kokuho N, Endo Y, Terasaki M, et al. Naftopidil  
563 reduced the proliferation of lung fibroblasts and bleomycin-induced lung fibrosis in mice. *J Cell*  
564 *Mol Med*. 2019;23(5):3563-71. Epub 20190315. doi: 10.1111/jcmm.14255. PubMed PMID:  
565 30873733; PubMed Central PMCID: PMCPMC6484423.
- 566 42. Serna-Salas SA, Arroyave-Ospina JC, Zhang M, Damba T, Buist-Homan M, Munoz-Ortega  
567 MH, et al. alpha-1 Adrenergic receptor antagonist doxazosin reverses hepatic stellate cells  
568 activation via induction of senescence. *Mech Ageing Dev*. 2022;201:111617. Epub 20211224. doi:  
569 10.1016/j.mad.2021.111617. PubMed PMID: 34958827.
- 570 43. Perlini S, Palladini G, Ferrero I, Tozzi R, Fallarini S, Facchetti A, et al. Sympathectomy or  
571 doxazosin, but not propranolol, blunt myocardial interstitial fibrosis in pressure-overload  
572 hypertrophy. *Hypertension*. 2005;46(5):1213-8. Epub 20051010. doi:  
573 10.1161/01.HYP.0000185689.65045.4c. PubMed PMID: 16216989.
- 574 44. Pawluczyk IZ, Patel SR, Harris KP. The role of the alpha-1 adrenoceptor in modulating  
575 human mesangial cell matrix production. *Nephrol Dial Transplant*. 2006;21(9):2417-24. Epub  
576 20060516. doi: 10.1093/ndt/gfl230. PubMed PMID: 16705025.
- 577 45. Koenecke A, Powell M, Xiong R, Shen Z, Fischer N, Huq S, et al. Alpha-1 adrenergic  
578 receptor antagonists to prevent hyperinflammation and death from lower respiratory tract  
579 infection. *Elife*. 2021;10. Epub 20210611. doi: 10.7554/eLife.61700. PubMed PMID: 34114951;  
580 PubMed Central PMCID: PMCPMC8195605.
- 581 46. Li S, Jun T, Tyler J, Schadt E, Kao YH, Wang Z, et al. Inpatient Administration of Alpha-1-  
582 Adrenergic Receptor Blocking Agents Reduces Mortality in Male COVID-19 Patients. *Front Med*  
583 (Lausanne). 2022;9:849222. Epub 20220228. doi: 10.3389/fmed.2022.849222. PubMed PMID:  
584 35295598; PubMed Central PMCID: PMCPMC8919772.
- 585 47. Munoz-Ortega MH, Llamas-Ramirez RW, Romero-Delgadillo NI, Elias-Flores TG, Tavares-  
586 Rodriguez Ede J, Campos-Esparza Mdel R, et al. Doxazosin Treatment Attenuates Carbon  
587 Tetrachloride-Induced Liver Fibrosis in Hamsters through a Decrease in Transforming Growth  
588 Factor beta Secretion. *Gut Liver*. 2016;10(1):101-8. doi: 10.5009/gnl14459. PubMed PMID:  
589 26573293; PubMed Central PMCID: PMCPMC4694741.

- 590 48. Barnes PJ, Wilson NM, Vickers H. Prazosin, an alpha 1-adrenoceptor antagonist, partially  
591 inhibits exercise-induced asthma. *J Allergy Clin Immunol.* 1981;68(6):411-5. doi: 10.1016/0091-  
592 6749(81)90193-7. PubMed PMID: 6118384.
- 593 49. Koshimizu TA, Tanoue A, Hirasawa A, Yamauchi J, Tsujimoto G. Recent advances in alpha1-  
594 adrenoceptor pharmacology. *Pharmacol Ther.* 2003;98(2):235-44. doi: 10.1016/s0163-  
595 7258(03)00033-0. PubMed PMID: 12725871.
- 596 50. Kyncl JJ. Pharmacology of terazosin. *Am J Med.* 1986;80(5B):12-9. doi: 10.1016/0002-  
597 9343(86)90846-6. PubMed PMID: 2872801.
- 598 51. Li H, Xu TY, Li Y, Chia YC, Buranakitjaroen P, Cheng HM, et al. Role of alpha1-blockers in  
599 the current management of hypertension. *J Clin Hypertens (Greenwich).* 2022;24(9):1180-6. doi:  
600 10.1111/jch.14556. PubMed PMID: 36196467; PubMed Central PMCID: PMC9532918.
- 601 52. Butt AK, Patel J, Shirwany H, Mirza Q, Hoover J, Khouzam RN. Beneficial Extracardiac  
602 Effects of Cardiovascular Medications. *Curr Cardiol Rev.* 2022;18(2):e151021197270. doi:  
603 10.2174/1573403X17666211015145132. PubMed PMID: 34779371; PubMed Central PMCID:  
604 PMC9413730.
- 605 53. Somberg JC, Achari R, Laddu AR. Terazosin: pharmacokinetics and the effect of age and  
606 dose on the incidence of adverse events. *Am Heart J.* 1991;122(3 Pt 2):901-5. doi: 10.1016/0002-  
607 8703(91)90809-v. PubMed PMID: 1678920.
- 608 54. Goldie RG, Lulich KM, Paterson JW. Bronchial Alpha-Adrenoceptor Function in Asthma.  
609 *Trends Pharmacol Sci.* 1985;6(12):469-72. doi: Doi 10.1016/0165-6147(85)90225-1. PubMed  
610 PMID: WOS:A1985AXH3500012.
- 611 55. Barnes PJ, Ind PW, Dollery CT. Inhaled prazosin in asthma. *Thorax.* 1981;36(5):378-81. doi:  
612 10.1136/thx.36.5.378. PubMed PMID: 6118964; PubMed Central PMCID: PMC9471513.
- 613 56. Black JL, Salome C, Yan K, Shaw J. The action of prazosin and propylene glycol on  
614 methoxamine-induced bronchoconstriction in asthmatic subjects. *Br J Clin Pharmacol.*  
615 1984;18(3):349-53. doi: 10.1111/j.1365-2125.1984.tb02475.x. PubMed PMID: 6487474; PubMed  
616 Central PMCID: PMC9413730.
- 617 57. Strickland NH, Hughes JM, Hart DA, Myers MJ, Lavender JP. Cause of regional ventilation-  
618 perfusion mismatching in patients with idiopathic pulmonary fibrosis: a combined CT and  
619 scintigraphic study. *AJR Am J Roentgenol.* 1993;161(4):719-25. doi: 10.2214/ajr.161.4.8372745.  
620 PubMed PMID: 8372745.
- 621 58. Usmani OS, Biddiscombe MF, Yang S, Meah S, Oballa E, Simpson JK, et al. The topical study  
622 of inhaled drug (salbutamol) delivery in idiopathic pulmonary fibrosis. *Respir Res.* 2018;19(1):25.  
623 Epub 20180206. doi: 10.1186/s12931-018-0732-0. PubMed PMID: 29409488; PubMed Central  
624 PMCID: PMC9413730.
- 625 59. Bai X, Zhao G, Chen Q, Li Z, Gao M, Ho W, et al. Inhaled siRNA nanoparticles targeting IL11  
626 inhibit lung fibrosis and improve pulmonary function post-bleomycin challenge. *Sci Adv.*  
627 2022;8(25):eabn7162. Epub 20220622. doi: 10.1126/sciadv.abn7162. PubMed PMID: 35731866;  
628 PubMed Central PMCID: PMC9216512.
- 629

**A**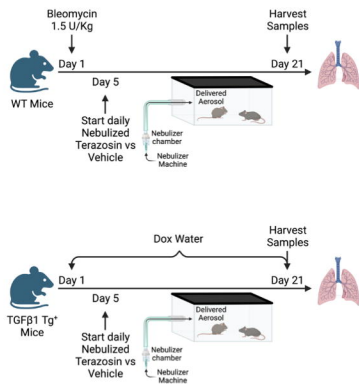**B**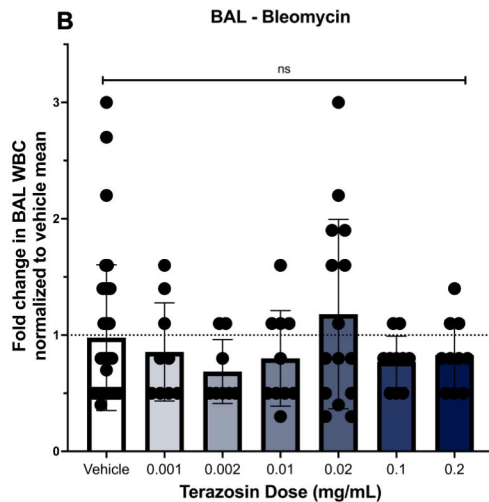**C**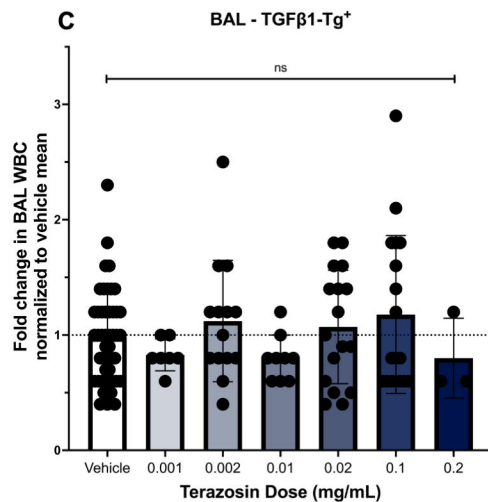

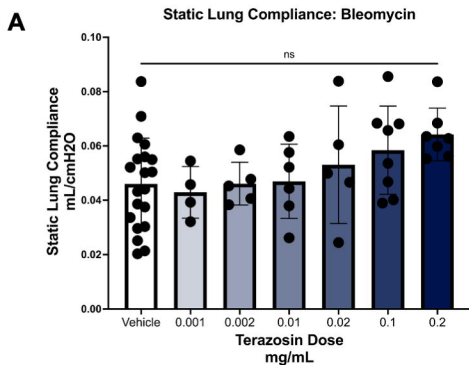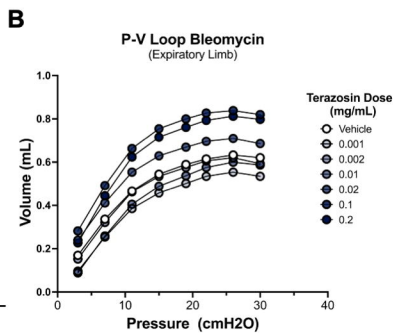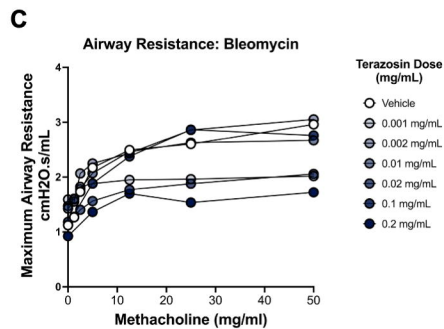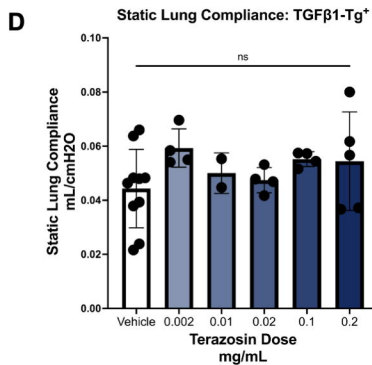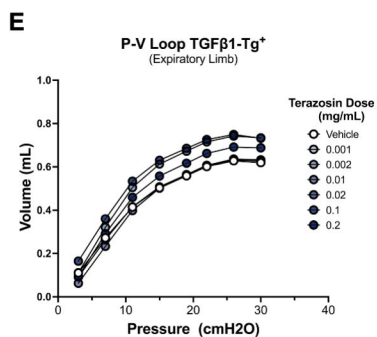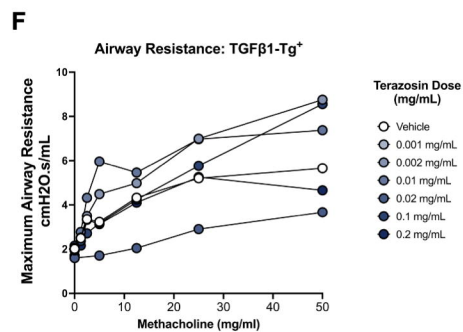

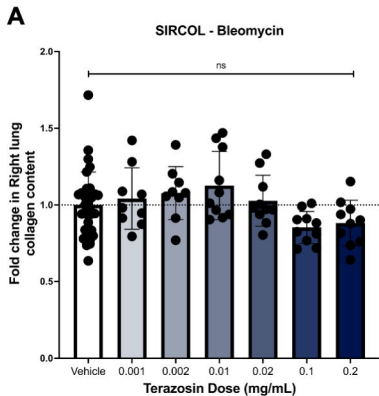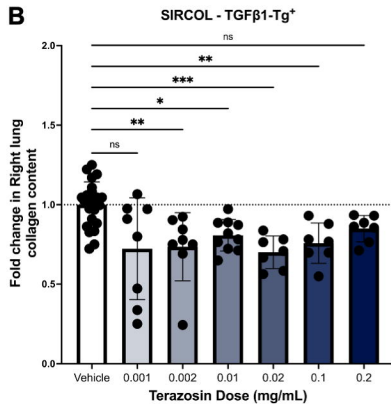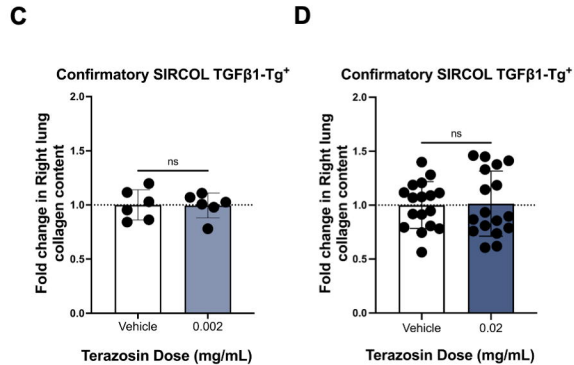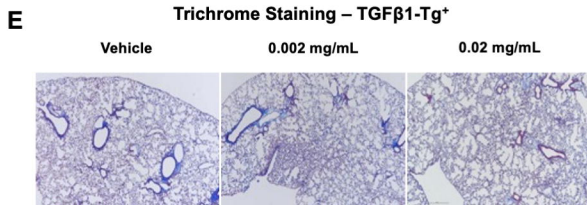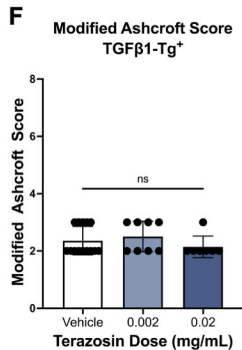



**A**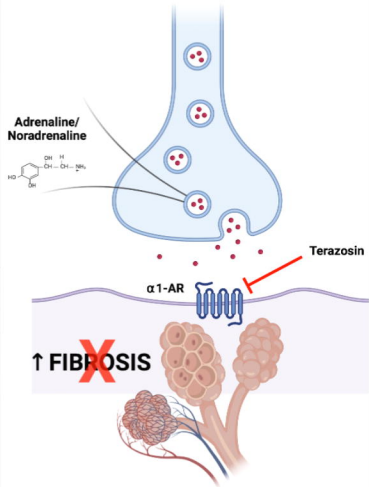**B** Nebulized Terazosin

Systemic Terazosin

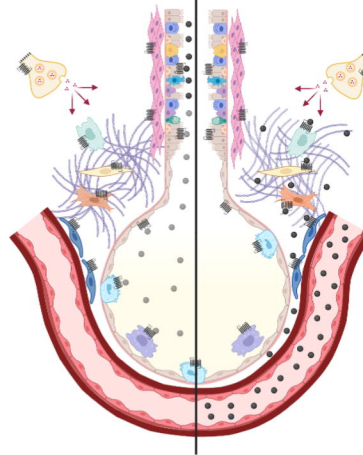**LEGEND**

- Noradrenaline
- Terazosin
- $\alpha 1$ -AR
- Interstitial Collagen
- Fibroblast
- Myofibroblast
- Interstitial Macrophage
- Alveolar Macrophage
- Type 1 Pneumocyte
- Type 2 Pneumocyte
- Pericyte
- Airway Smooth Muscle
- Adrenergic Nerve
- Alveolar Capillary
